# Supplementary material for: Synergistic impact of three complement polymorphisms in the donor, not the recipient, on long-term kidney allograft survival
Source: medRxiv preprint, doi:10.1101/2023.10.24.23297481, version 1 (2023-10-25)
Supplement: Supplemental data [file 297481_file02.docx]

**Supplemental Material**

**Figure S1**

**15-year death-censored kidney allografts survival stratified by the *C3R102G*, and *CFHV62I* variants in the donor**

**
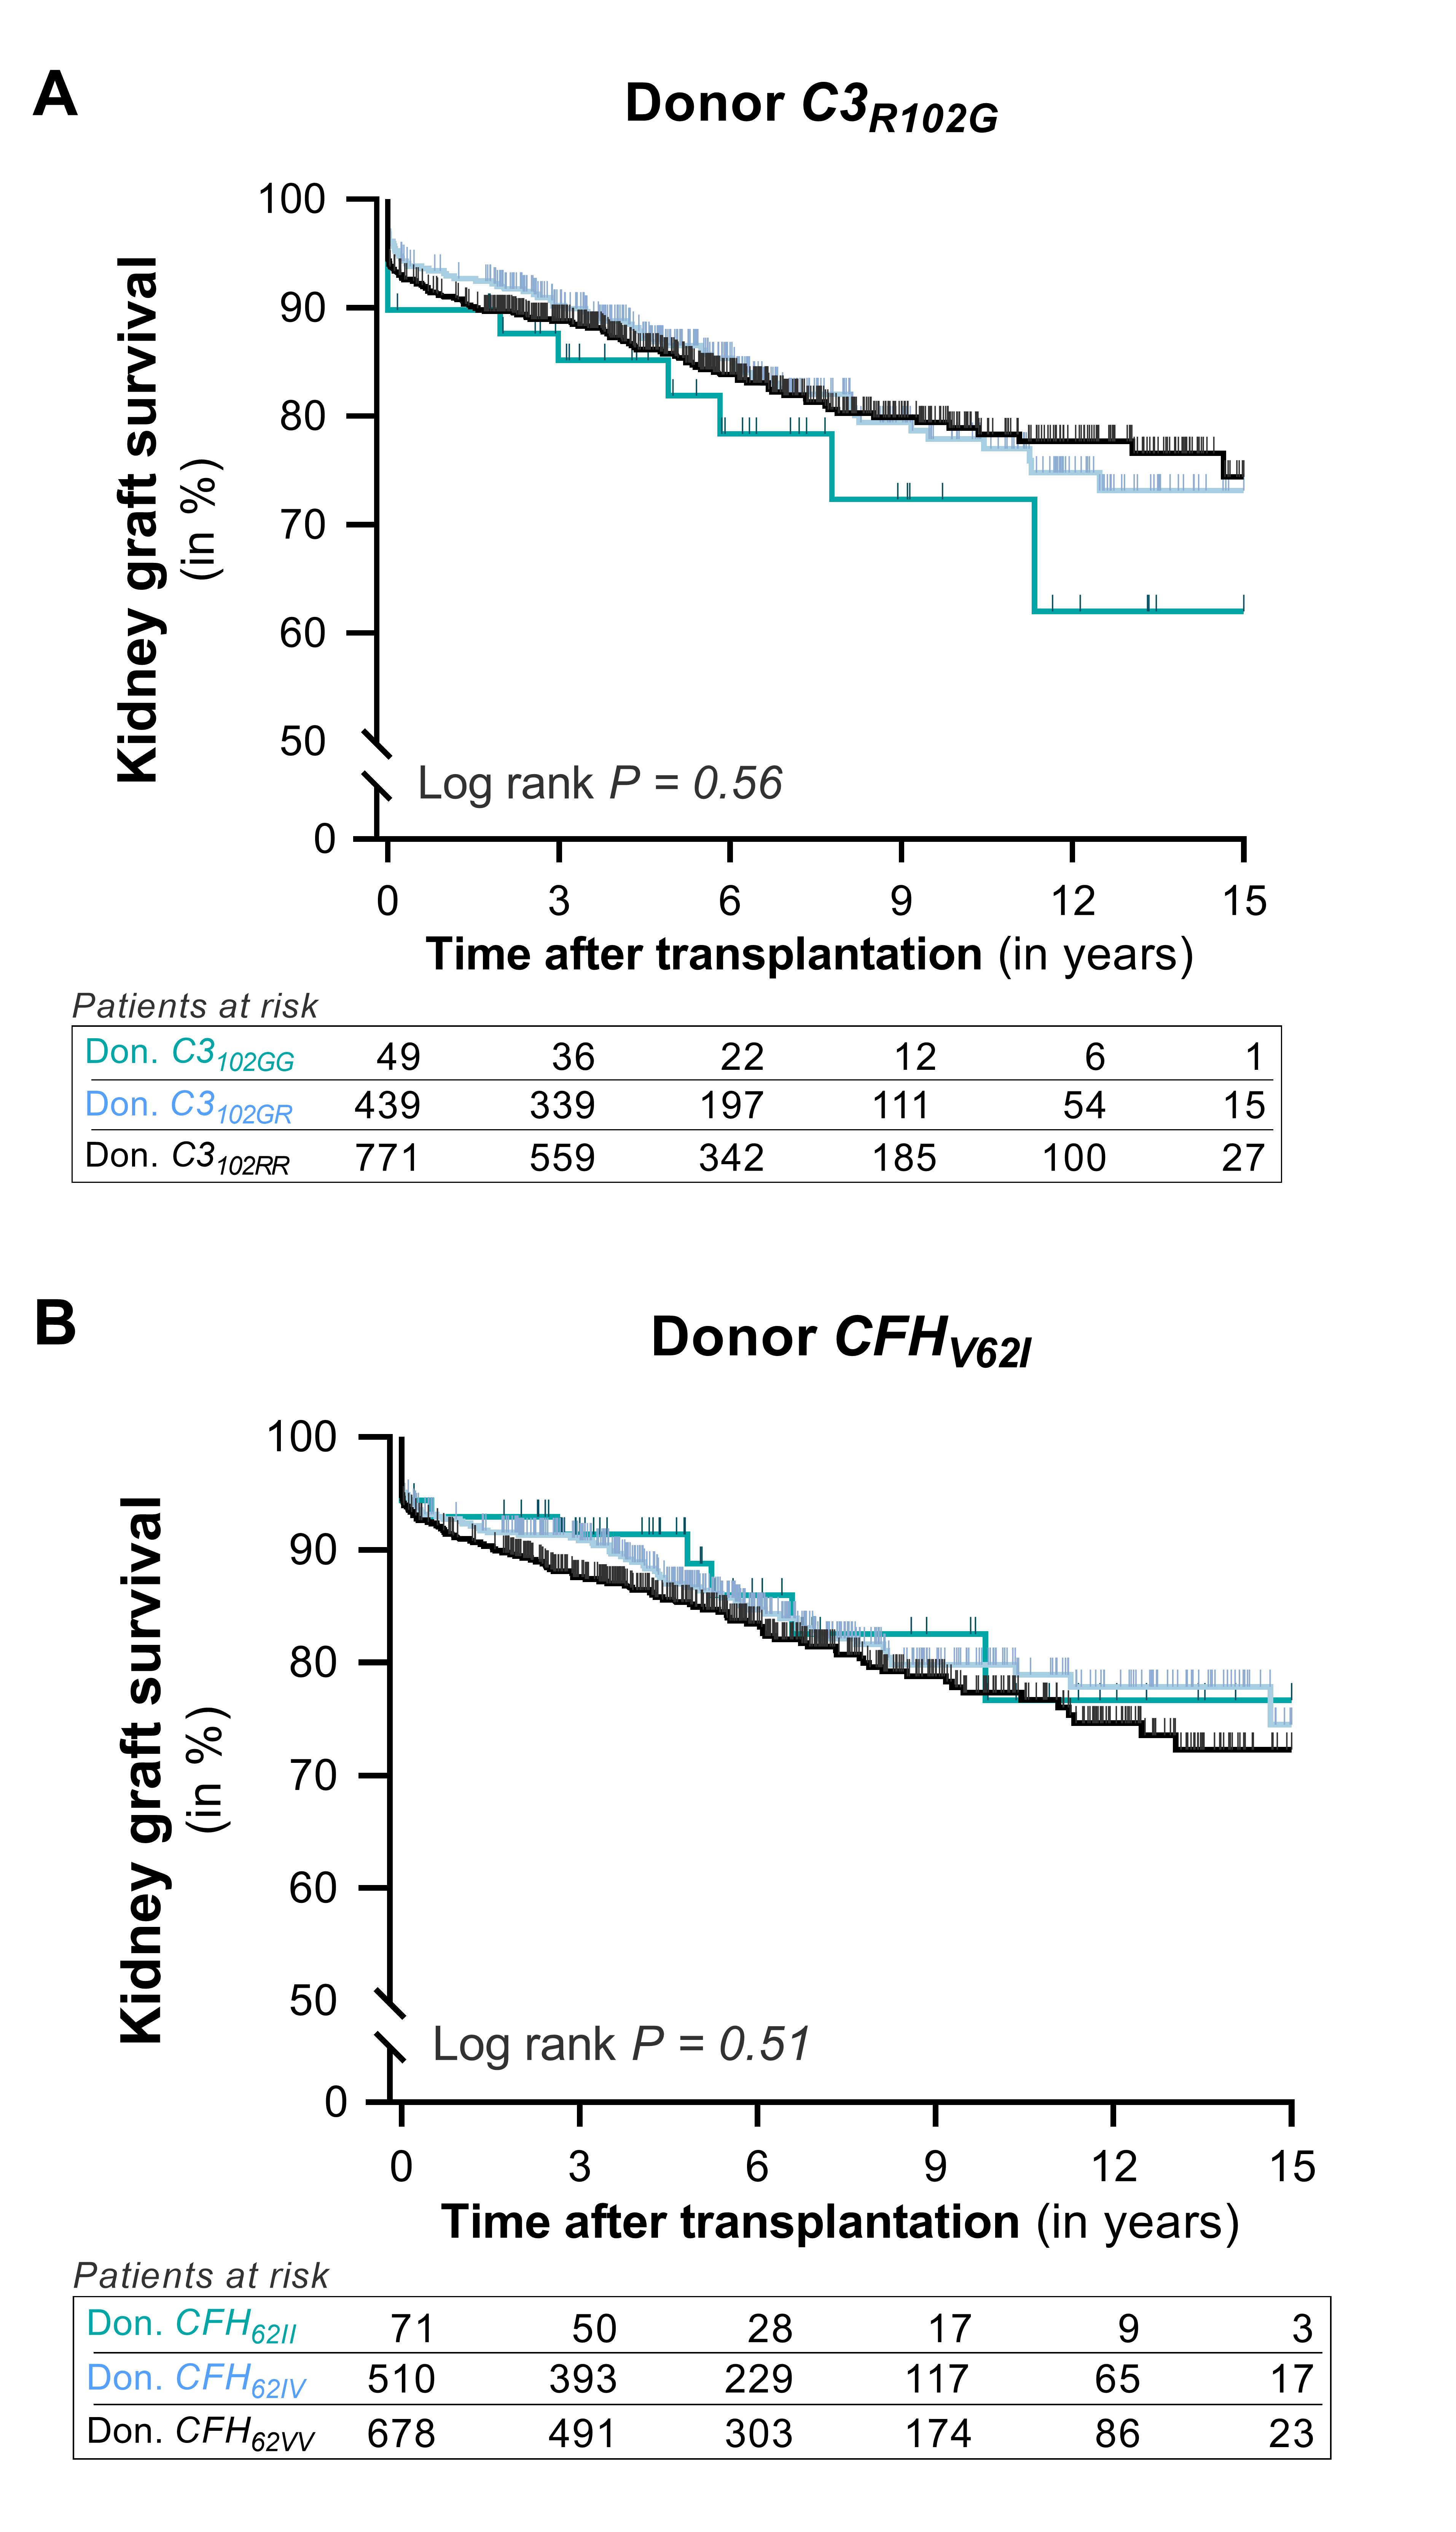
**

Cumulative death-censored survival of kidney allografts based on the presence of **(A)** the rs2230199 complement C3 gene polymorphism (*C3R102G*) and **(B)** the rs800292 complement factor H gene polymorphism (*CFHV62I*) in allograft donors. The data are represented through death-censored survival curves, and p-values were calculated using log-rank tests.

**Figure S2**

**15-year death-censored kidney allografts survival stratified by the *C3R102G*, *CFBR32Q* and *CFHV62I* variants in the recipient**

**
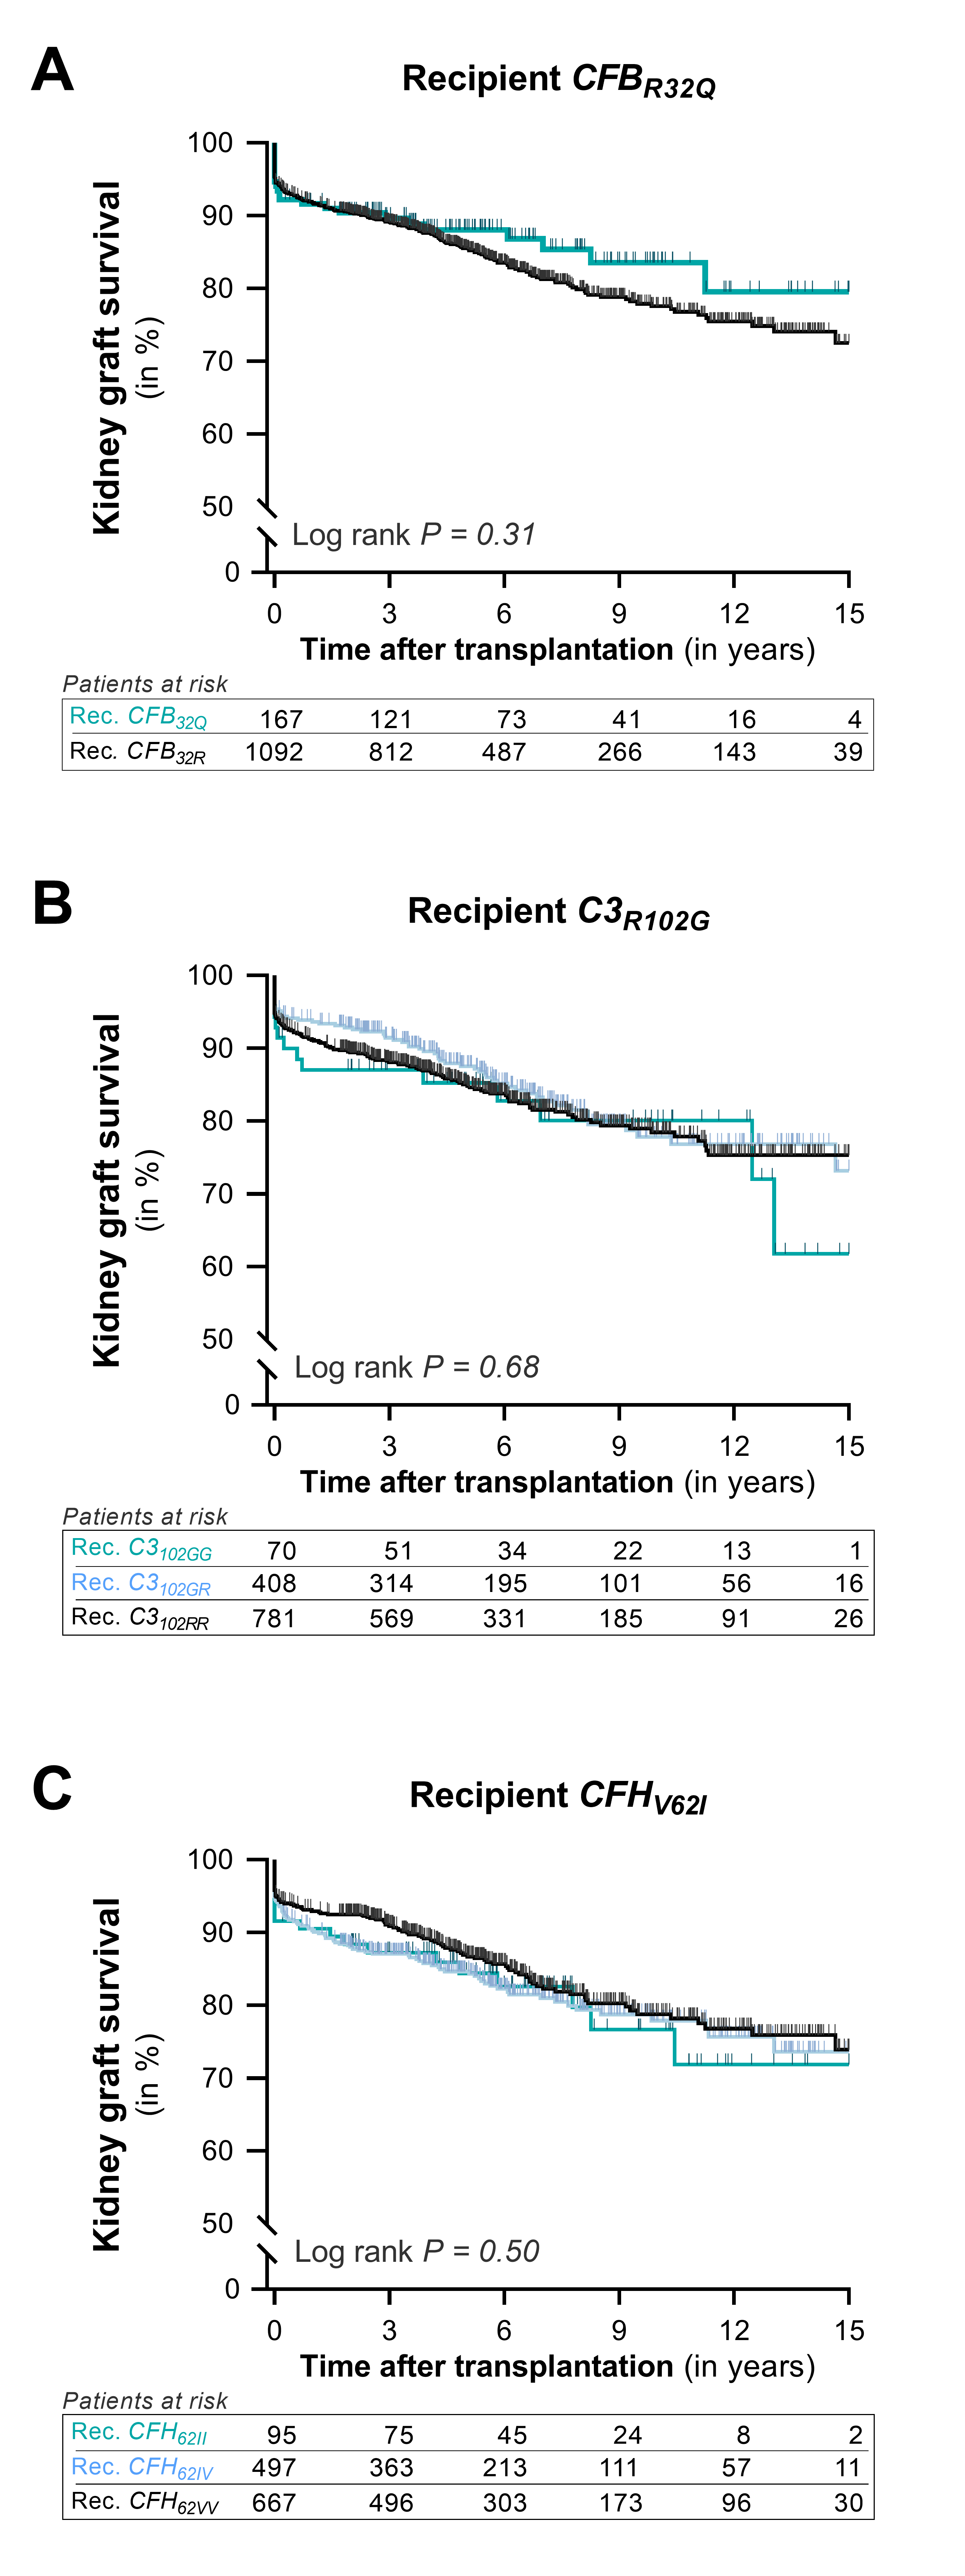
**

Cumulative death-censored survival of kidney allografts based on the presence of **(A)** the rs641153 complement factor B gene polymorphism (*CFBR32Q*), **(B)** the rs2230199 complement C3 gene polymorphism (*C3R102G*), and **(C)** the rs800292 complement factor H gene polymorphism (*CFHV62I*) in the recipient. The data are represented through death-censored survival curves, and p-values were calculated using log-rank tests.

**Figure S3**

**Kaplan–Meier curves of renal allograft survival according to the recipient complotype**

**
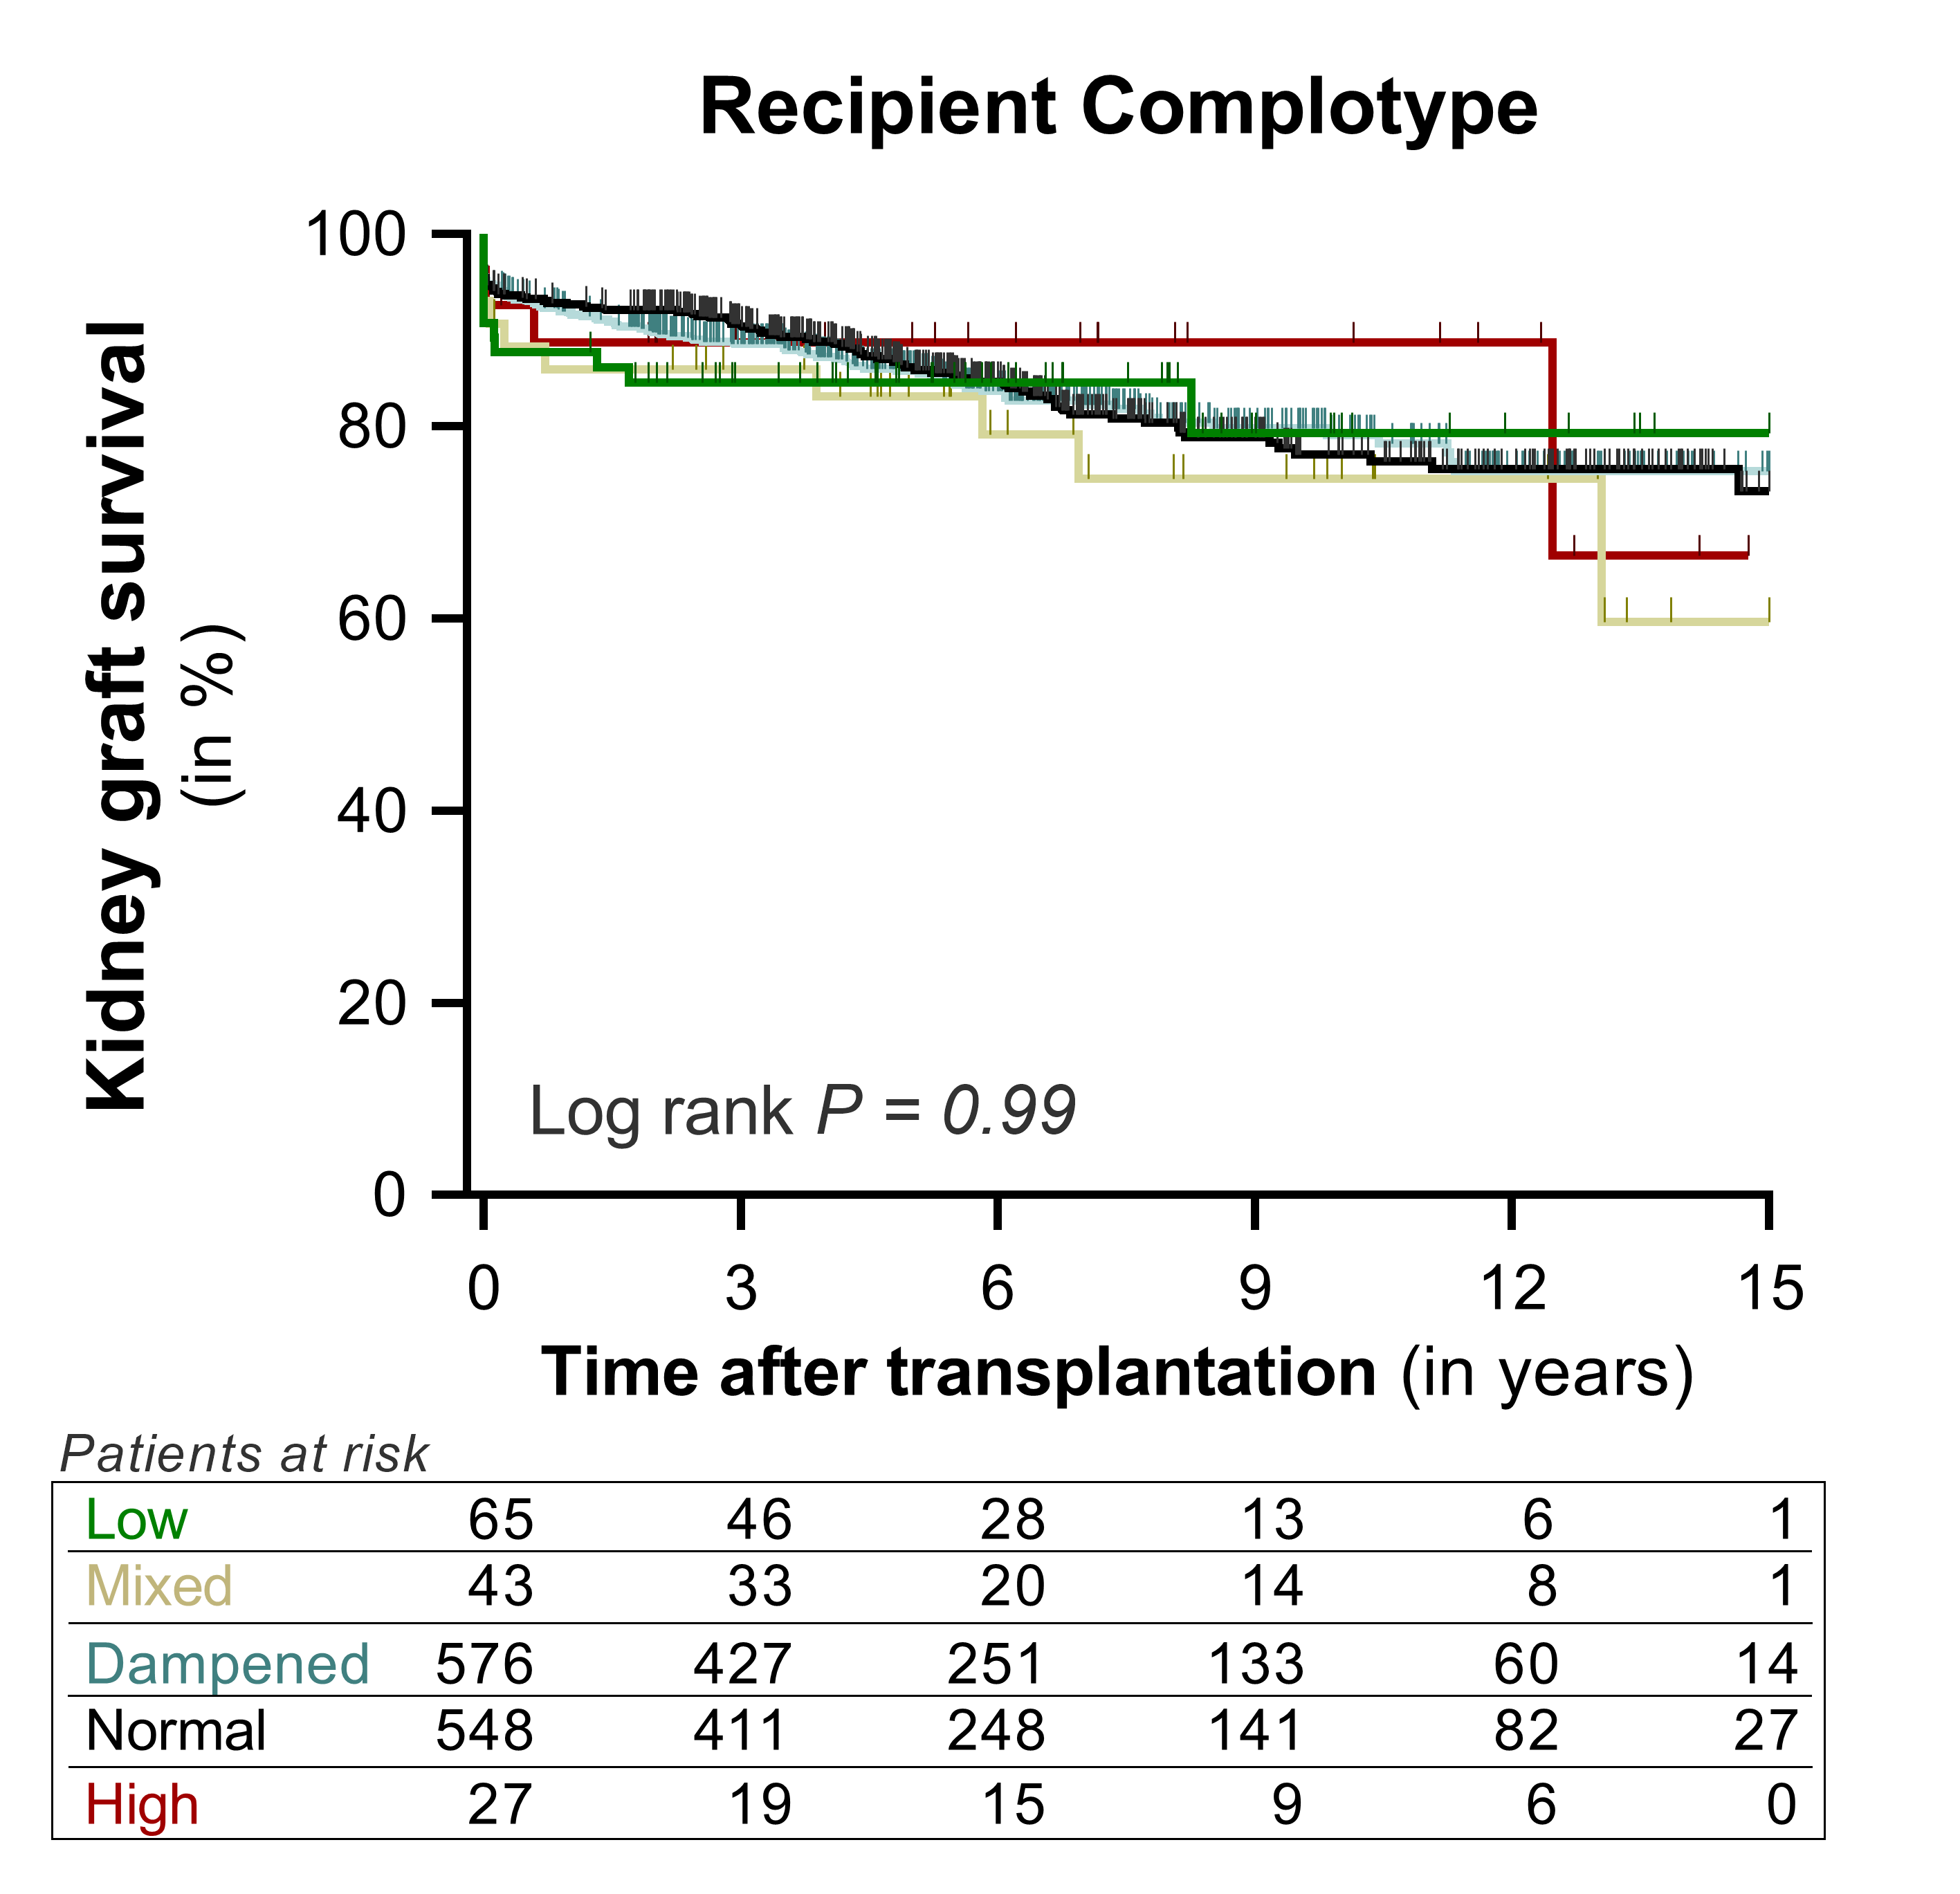
**

Cumulative death-censored graft survival of kidney allografts based on the combined presence of the *C3R102G, CFHV62I,* and *CFBR32Q* polymorphisms in kidney transplant recipients. The comparisons include: (i) high activity complotype (red line), which consists of the gain-of-function *C3102G* variant and the reference variants for the other two polymorphisms (*C3102G/CFB32R/CFH62V*)*;* (ii) normal activity complotype (black line), consisting of the reference variants for all three polymorphisms (*C3102R/CFB32R/CFH62V*); (iii) dampened complotype (light blue line), consisting of either the gain-of-function *CFH62I* or the loss-of-function *CFB32Q* variant with reference variants for the other two polymorphisms (*C3102R/CFB32R/CFH62I* or *C3102R/CFB32Q/CFH62V*); (iv) mixed Complotype (yellow line), consisting of the gain-of-function *C3102G* variant together with the gain-of-function *CFH62I* and/or the loss-of-function *CFB32Q*; and (v) low activity complotype (green line), consisting of both the gain-of-function *CFH62I* and the loss-of-function *CFB32Q* varianttogether with the reference *C3102R* variant (*C3102R/CFB32Q/CFH62I*). The data are represented through death-censored survival curves, and P-values were calculated using log-rank tests.
